# Supplementary material for: Evaluation of novel coagulation and platelet function assays in patients with chronic kidney disease
Source: PubMed Central journal article supplement — J Thromb Haemost. 2022 Feb 3;20(4):845–56. doi: 10.1111/jth.15653 (PMC9306477; doi:10.1111/jth.15653), 2022-02-03
Supplement: JTH-20-845-s001.pdf [file JTH-20-845-s001.pdf]

**Table S1. Number of participants with missing data.**

|                                                                          | Total | Patients with CKD | Healthy Controls | CKD stage 2 | CKD stage 3 | CKD stage 4 | CKD stage 5 | HD New starters | Established HD | Transplant |
|--------------------------------------------------------------------------|-------|-------------------|------------------|-------------|-------------|-------------|-------------|-----------------|----------------|------------|
| <b>BMI</b>                                                               | 10    | 9                 | 1                | 0           | 5           | 1           | 1           | 1               | 0              | 1          |
| <b>Urea</b>                                                              | 9     | 2                 | 7                | 1           | 1           | 0           | 0           | 0               | 0              | 0          |
| <b>INR</b>                                                               | 21    | 12                | 9                | 0           | 5           | 3           | 2           | 0               | 0              | 2          |
| <b>APTT</b>                                                              | 21    | 12                | 9                | 0           | 5           | 3           | 2           | 0               | 0              | 2          |
| <b>HGB, PCV and Platelets</b>                                            | 7     | 0                 | 7                | 0           | 0           | 0           | 0           | 0               | 0              | 0          |
| <b>ADP, ASPI and TRAP tests</b>                                          | 4     | 4                 | 0                | 0           | 2           | 0           | 1           | 0               | 1              | 0          |
| <b>Lag time, Peak, ttP and ETP</b>                                       | 1     | 1                 | 0                | 0           | 0           | 0           | 0           | 0               | 1              | 0          |
| <b><math>\alpha</math>-2 antiplasmin, PAI-1, TAT, D-dimer and ICAM-1</b> | 1     | 1                 | 0                | 0           | 0           | 0           | 1           | 0               | 0              | 0          |
| <b>ROTEM INTEM</b>                                                       |       |                   |                  |             |             |             |             |                 |                |            |
| CT, CFT, $\alpha$ -angle, MCF, ML                                        | 2     | 2                 | 0                | 0           | 1           | 0           | 0           | 1               | 0              | 0          |
| A5, A10, A20, LI30                                                       | 3     | 3                 | 0                | 0           | 1           | 0           | 0           | 2               | 0              | 0          |
| <b>ROTEM EXTEM</b>                                                       |       |                   |                  |             |             |             |             |                 |                |            |
| CT, CFT, $\alpha$ -angle, A5, MCF, ML                                    | 2     | 2                 | 0                | 0           | 1           | 0           | 0           | 1               | 0              | 0          |
| A10, A20, LI30                                                           | 3     | 3                 | 0                | 0           | 1           | 0           | 0           | 2               | 0              | 0          |
| <b>ROTEM FIBTEM</b>                                                      |       |                   |                  |             |             |             |             |                 |                |            |
| MCF                                                                      | 3     | 3                 | 0                | 0           | 1           | 0           | 0           | 2               | 0              | 0          |

CKD indicates Chronic Kidney Disease; HD, Haemodialysis; BMI, Body Mass Index; INR, International Normalisation Ratio; APTR, Activated Partial Thromboplastin Ratio; HGB, Haemoglobin; PCV, Packed Cell Volume; ADP, Adenosine Diphosphate; ASPI, Aspirin; and TRAP, Thrombin Receptor Activating Peptide; ttP, time to Peak; ETP, Endogenous Thrombin Potential; PAI-1, Platelet Activator Inhibitor-1; TAT, Thrombin Antithrombin; ICAM-1, Intercellular Adhesion Molecule-1; ROTEM, Rotational Thromboelastometry; CT, Clotting time; CFT, Clot Formation Time; MCF, Maximum Clot firmness; ML, Maximum Lysis; LI30, Lysis index at 30 minutes
